# Supplementary material
Source: HighWire-hosted journal article supplement (https://emboj.embopress.org/content/31/21/4191)

# Source data Supplementary Figure 1

Original Scan for Figure S1B:

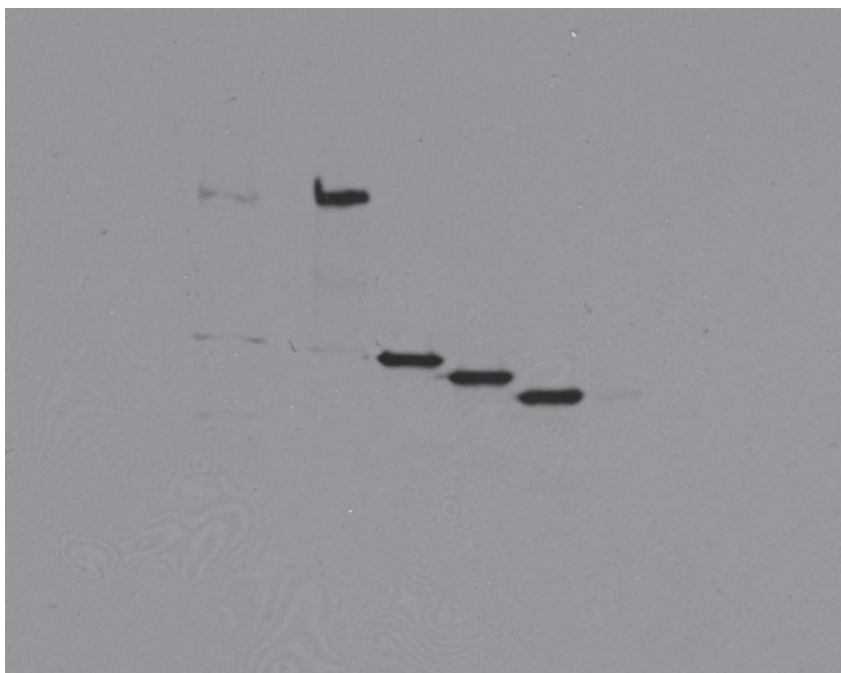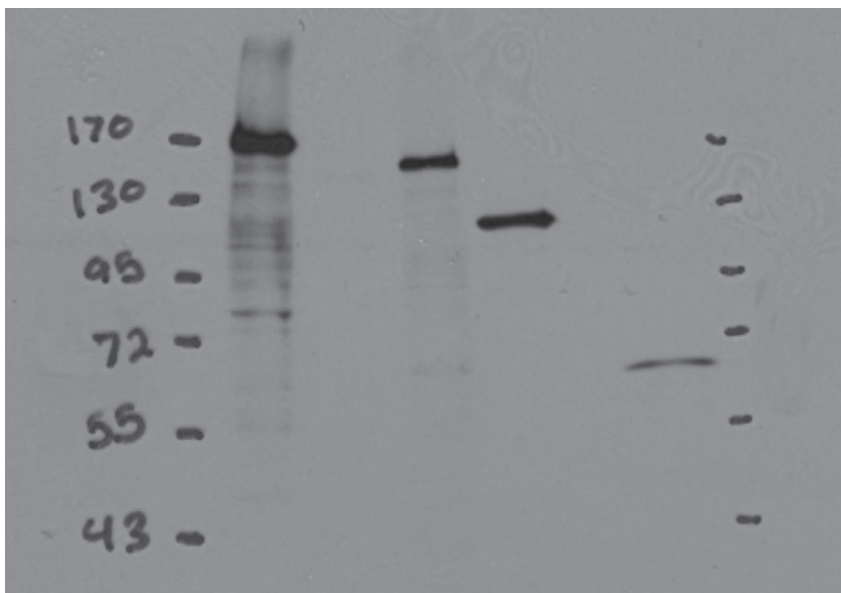

Supplement: inline-supplementary-material-6 [file inline-supplementary-material-6.pdf]

# Source data Supplementary Figure 5

Original Scan for Figure S5F:

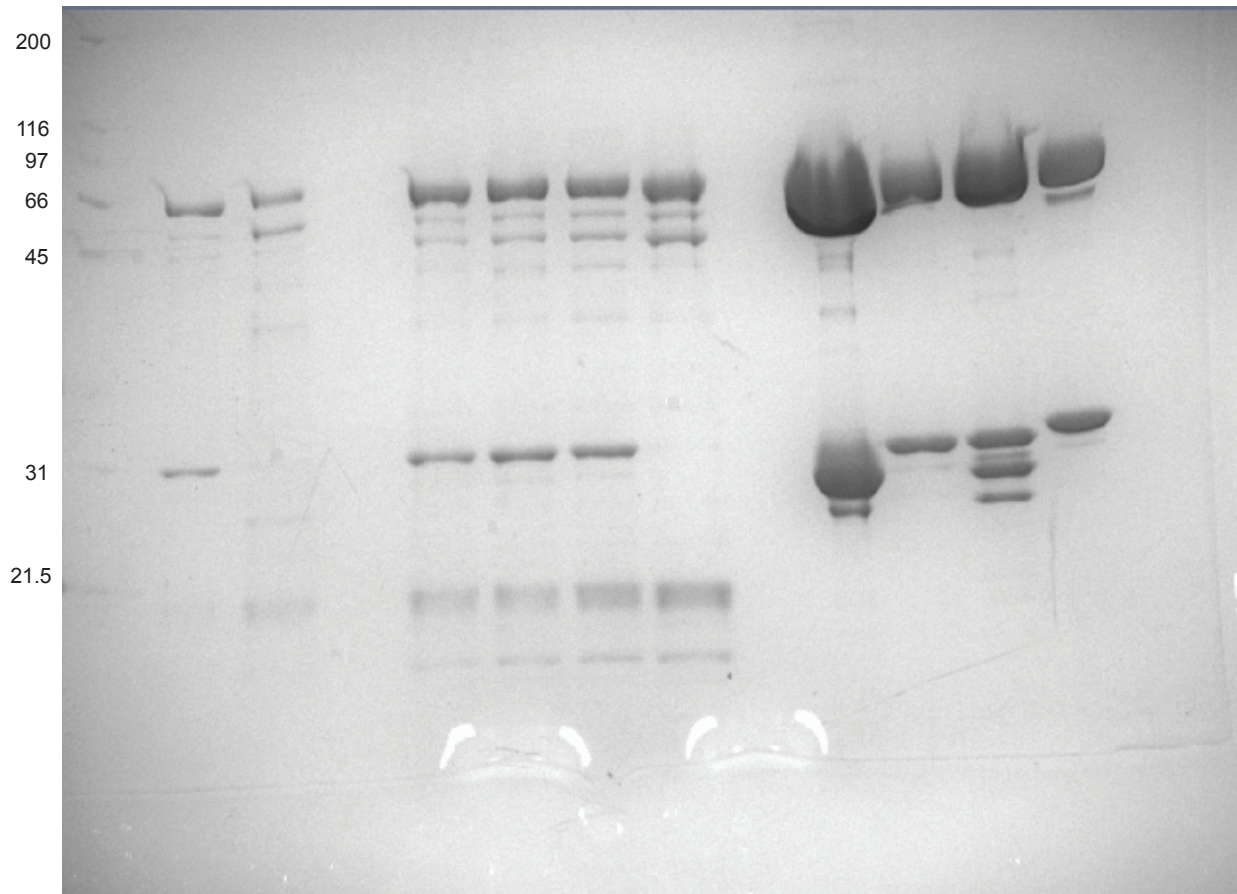

Supplement: inline-supplementary-material-8 [file inline-supplementary-material-8.pdf]
